# Supplementary material for: Effect of Light Emitting Diodes (LED) Exposure on Vitreous Metabolites-Rodent Study
Source: MDPI journal article supplement (doi:10.3390/metabo13010081), 2023-01-03
Supplement: s1 [file s1]

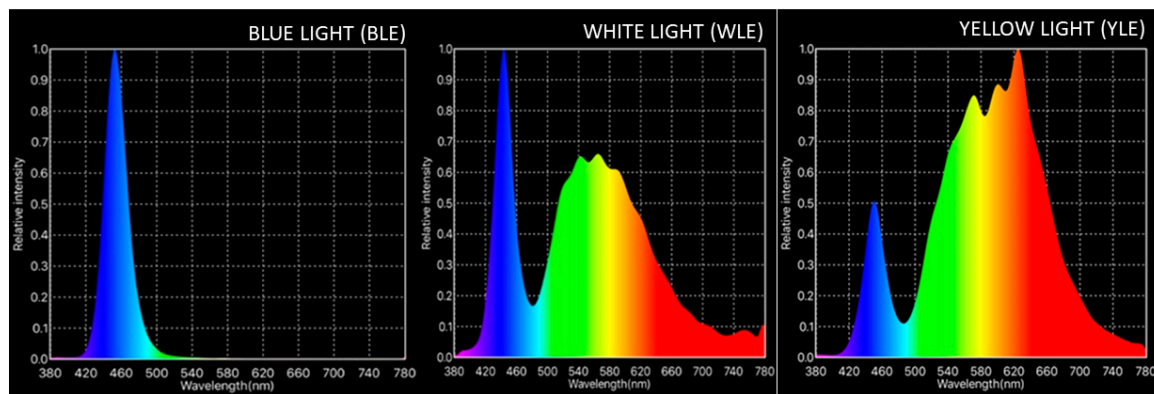

**Figure S1.** Explains the light sources that were used for the experiment. The blue LED. ((400–490 nm), BLE 1a:), white LED ((380–780 nm), WLE 1b:) and (yellow LED (400–780 nm) YLE 1c: The peak emission (420–470) spectrum curves for the blue light were seen in white light similar to blue LED light and the peak was declined in the yellow light.
